# Supplementary material for: Thiazole Functionalization of Thiosemicarbazone for Cu(II) Complexation: Toward Highly Efficient Anticancer Drugs with Promising Oral Bioavailability
Source: Preprints.org preprint supplement (doi:10.20944/preprints202407.1597.v1), 2024-07-19

## checkCIF/PLATON report

You have not supplied any structure factors. As a result the full set of tests cannot be run.

THIS REPORT IS FOR GUIDANCE ONLY. IF USED AS PART OF A REVIEW PROCEDURE FOR PUBLICATION, IT SHOULD NOT REPLACE THE EXPERTISE OF AN EXPERIENCED CRYSTALLOGRAPHIC REFEREE.

No syntax errors found.      CIF dictionary      Interpreting this report

### Datablock: CU

---

|                        |                       |                       |              |
|------------------------|-----------------------|-----------------------|--------------|
| Bond precision:        | C-C = 0.0093 A        | Wavelength=0.71073    |              |
| Cell:                  | a=10.7226 (16)        | b=9.6646 (15)         | c=21.695 (3) |
|                        | alpha=90              | beta=104.187 (2)      | gamma=90     |
| Temperature:           | 213 K                 |                       |              |
|                        | Calculated            | Reported              |              |
| Volume                 | 2179.7 (6)            | 2179.7 (6)            |              |
| Space group            | P 21/n                | P 21/n                |              |
| Hall group             | -P 2yn                | -P 2yn                |              |
| Moiety formula         | C38 H36 Cu2 N16 O6 S4 | C38 H36 Cu2 N16 O6 S4 |              |
| Sum formula            | C38 H36 Cu2 N16 O6 S4 | C38 H36 Cu2 N16 O6 S4 |              |
| Mr                     | 1068.17               | 1068.15               |              |
| Dx, g cm <sup>-3</sup> | 1.628                 | 1.627                 |              |
| Z                      | 2                     | 2                     |              |
| Mu (mm <sup>-1</sup> ) | 1.235                 | 1.235                 |              |
| F000                   | 1092.0                | 1092.0                |              |
| F000'                  | 1094.57               |                       |              |
| h, k, lmax             | 13, 12, 27            | 13, 12, 27            |              |
| Nref                   | 4444                  | 4404                  |              |
| Tmin, Tmax             | 0.929, 0.940          | 0.929, 0.940          |              |
| Tmin'                  | 0.539                 |                       |              |

Correction method= # Reported T Limits: Tmin=0.929 Tmax=0.940  
AbsCorr = MULTI-SCAN

Data completeness= 0.991      Theta(max)= 26.368

|                                |                   |
|--------------------------------|-------------------|
| R(reflections)= 0.0677 ( 3194) | wR2(reflections)= |
| S = 1.048                      | 0.1573 ( 4404)    |
| Npar= 298                      |                   |

---

The following ALERTS were generated. Each ALERT has the format

**test-name\_ALERT\_alert-type\_alert-level.**

Click on the hyperlinks for more details of the test.

---

### Alert level B

PLAT213\_ALERT\_2\_B Atom C7 has ADP max/min Ratio ..... 4.1 prolat

---

### Alert level C

PLAT213\_ALERT\_2\_C Atom C5 has ADP max/min Ratio ..... 3.2 prolat  
PLAT220\_ALERT\_2\_C NonSolvent Resd 1 C Ueq(max)/Ueq(min) Range 4.4 Ratio  
PLAT241\_ALERT\_2\_C High 'MainMol' Ueq as Compared to Neighbors of O3 Check  
PLAT241\_ALERT\_2\_C High 'MainMol' Ueq as Compared to Neighbors of C5 Check  
PLAT241\_ALERT\_2\_C High 'MainMol' Ueq as Compared to Neighbors of C6 Check  
PLAT241\_ALERT\_2\_C High 'MainMol' Ueq as Compared to Neighbors of C7 Check  
PLAT242\_ALERT\_2\_C Low 'MainMol' Ueq as Compared to Neighbors of N2 Check  
PLAT242\_ALERT\_2\_C Low 'MainMol' Ueq as Compared to Neighbors of N3 Check  
PLAT341\_ALERT\_3\_C Low Bond Precision on C-C Bonds ..... 0.00931 Ang.  
PLAT360\_ALERT\_2\_C Short C(sp3)-C(sp3) Bond C4 - C5 . 1.40 Ang.  
PLAT360\_ALERT\_2\_C Short C(sp3)-C(sp3) Bond C6 - C7 . 1.39 Ang.  
PLAT761\_ALERT\_1\_C CIF Contains no X-H Bonds ..... Please Check  
PLAT762\_ALERT\_1\_C CIF Contains no X-Y-H or H-Y-H Angles ..... Please Check  
PLAT790\_ALERT\_4\_C Centre of Gravity not Within Unit Cell: Resd. # 1 Note  
C38 H36 Cu2 N16 O6 S4

---

### Alert level G

PLAT066\_ALERT\_1\_G Predicted and Reported Tmin&Tmax Range Identical ? Check  
PLAT083\_ALERT\_2\_G SHELXL Second Parameter in WGHT Unusually Large 18.48 Why ?  
PLAT794\_ALERT\_5\_G Tentative Bond Valency for Cu1 (II) . 2.19 Info  
PLAT883\_ALERT\_1\_G No Info/Value for \_atom\_sites\_solution\_primary . Please Do !  
PLAT965\_ALERT\_2\_G The SHELXL WEIGHT Optimisation has not Converged Please Check

---

- 0 **ALERT level A** = Most likely a serious problem - resolve or explain  
1 **ALERT level B** = A potentially serious problem, consider carefully  
14 **ALERT level C** = Check. Ensure it is not caused by an omission or oversight  
5 **ALERT level G** = General information/check it is not something unexpected
- 4 ALERT type 1 CIF construction/syntax error, inconsistent or missing data  
13 ALERT type 2 Indicator that the structure model may be wrong or deficient  
1 ALERT type 3 Indicator that the structure quality may be low  
1 ALERT type 4 Improvement, methodology, query or suggestion  
1 ALERT type 5 Informative message, check
- 

## checkCIF publication errors

### Alert level A

PUBL004\_ALERT\_1\_A The contact author's name and address are missing,  
\_publ\_contact\_author\_name and \_publ\_contact\_author\_address.  
PUBL005\_ALERT\_1\_A \_publ\_contact\_author\_email, \_publ\_contact\_author\_fax and

\_publ\_contact\_author\_phone are all missing.  
    At least one of these should be present.  
PUBL006\_ALERT\_1\_A \_publ\_requested\_journal is missing  
    e.g. 'Acta Crystallographica Section C'  
PUBL008\_ALERT\_1\_A \_publ\_section\_title is missing. Title of paper.  
PUBL009\_ALERT\_1\_A \_publ\_author\_name is missing. List of author(s) name(s).  
PUBL010\_ALERT\_1\_A \_publ\_author\_address is missing. Author(s) address(es).  
PUBL012\_ALERT\_1\_A \_publ\_section\_abstract is missing.  
    Abstract of paper in English.

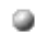

#### **Alert level G**

PUBL017\_ALERT\_1\_G The \_publ\_section\_references section is missing or empty.

---

7 **ALERT level A** = Data missing that is essential or data in wrong format  
1 **ALERT level G** = General alerts. Data that may be required is missing

---

### **Publication of your CIF**

You should attempt to resolve as many as possible of the alerts in all categories. Often the minor alerts point to easily fixed oversights, errors and omissions in your CIF or refinement strategy, so attention to these fine details can be worthwhile. In order to resolve some of the more serious problems it may be necessary to carry out additional measurements or structure refinements. However, the nature of your study may justify the reported deviations from journal submission requirements and the more serious of these should be commented upon in the discussion or experimental section of a paper or in the "special\_details" fields of the CIF. *checkCIF* was carefully designed to identify outliers and unusual parameters, but every test has its limitations and alerts that are not important in a particular case may appear. Conversely, the absence of alerts does not guarantee there are no aspects of the results needing attention. It is up to the individual to critically assess their own results and, if necessary, seek expert advice.

If level A alerts remain, which you believe to be justified deviations, and you intend to submit this CIF for publication in a journal, you should additionally insert an explanation in your CIF using the Validation Reply Form (VRF) below. This will allow your explanation to be considered as part of the review process.

### **Validation response form**

Please find below a validation response form (VRF) that can be filled in and pasted into your CIF.

```
# start Validation Reply Form
_vrf_PUBL004_GLOBAL
;
PROBLEM: The contact author's name and address are missing,
RESPONSE: ...
;
_vrf_PUBL005_GLOBAL
;
PROBLEM: _publ_contact_author_email, _publ_contact_author_fax and
```

```

RESPONSE: ...
;
_vrf_PUBL006_GLOBAL
;
PROBLEM: _publ_requested_journal is missing
RESPONSE: ...
;
_vrf_PUBL008_GLOBAL
;
PROBLEM: _publ_section_title is missing. Title of paper.
RESPONSE: ...
;
_vrf_PUBL009_GLOBAL
;
PROBLEM: _publ_author_name is missing. List of author(s) name(s).
RESPONSE: ...
;
_vrf_PUBL010_GLOBAL
;
PROBLEM: _publ_author_address is missing. Author(s) address(es).
RESPONSE: ...
;
_vrf_PUBL012_GLOBAL
;
PROBLEM: _publ_section_abstract is missing.
RESPONSE: ...
;
# end Validation Reply Form

```

If you wish to submit your CIF for publication in Acta Crystallographica Section C or E, you should upload your CIF via the web. If you wish to submit your CIF for publication in IUCrData you should upload your CIF via the web. If your CIF is to form part of a submission to another IUCr journal, you will be asked, either during electronic submission or by the Co-editor handling your paper, to upload your CIF via our web site.

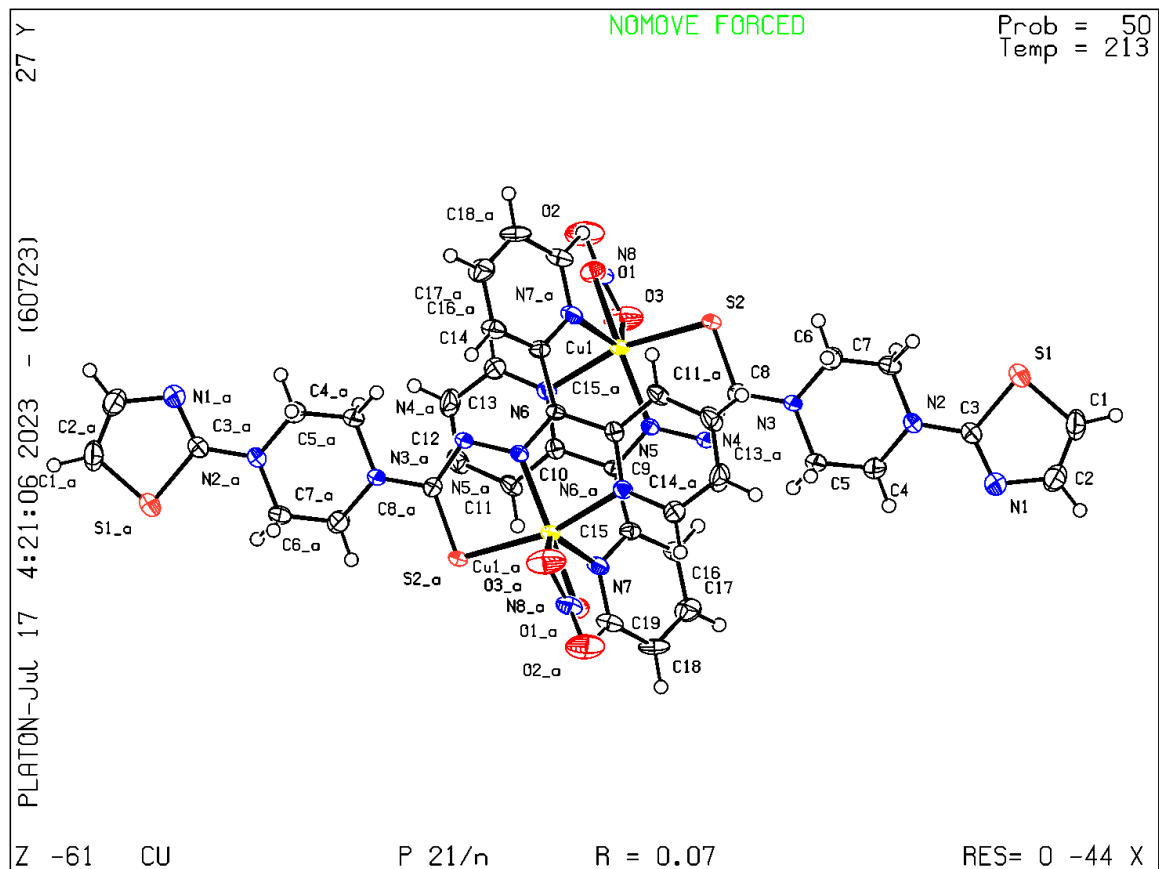

Supplement: Supplementary file 3 [file supplementary]
