# Supplementary material for: Thiazole Functionalization of Thiosemicarbazone for Cu(II) Complexation: Toward Highly Efficient Anticancer Drugs with Promising Oral Bioavailability
Source: Preprints.org preprint supplement (doi:10.20944/preprints202407.1597.v1), 2024-07-19
Supplement: Supplementary file 4 [file supplementary]

*Supplementary Material for*

# **Thiazole Functionalization of Thiosemicarbazone for Cu(II) Complexation: Toward Highly Efficient Anticancer Drugs with Promising Oral Bioavailability**

**Song-Yu Luo,<sup>1,‡</sup> Chun-Mei Zeng,<sup>1,‡</sup> Ping Xu,<sup>2</sup> Ye Ning,<sup>1</sup> Meng-Lin Dong,<sup>1</sup> Wen-Hua Zhang,<sup>1,\*</sup> and Guangliang Yu<sup>2,\*</sup>**

<sup>1</sup> College of Chemistry, Chemical Engineering, and Materials Science, Soochow University, Suzhou 215123, China

<sup>2</sup> Suzhou Degen Bio-medical Co., Ltd., No.1 Huayun Road, Suzhou Industrial Park, Suzhou, 215000, Jiangsu, China

<sup>‡</sup> These authors contributed equally to this work

<sup>\*</sup> Correspondence: whzhang@suda.edu.cn (W.-H.Z.); yuguangliang@degrontech.onaliyun.com (G.Y.)

## Table of Contents

|                                                                                                                                                                                                                                                                                                                                                                        |    |
|------------------------------------------------------------------------------------------------------------------------------------------------------------------------------------------------------------------------------------------------------------------------------------------------------------------------------------------------------------------------|----|
| <b>Figure S1.</b> $^1\text{H}$ (a) and $^{13}\text{C}$ (b) NMR spectrum of HL in DMSO- $d_6$ .....                                                                                                                                                                                                                                                                     | 3  |
| <b>Figure S2.</b> The EDS elemental ratios of <b>1</b> (a) and <b>2</b> (b) and their respective elemental mapping diagrams.....                                                                                                                                                                                                                                       | 4  |
| <b>Figure S3.</b> The FT-IR of HL (light red), <b>1</b> (light orange), and <b>2</b> (light blue).....                                                                                                                                                                                                                                                                 | 5  |
| <b>Figure S4.</b> Change of UV-Vis absorption intensity in the range of 500–750 nm (peaked at 652 nm; oxTMB) upon treatment with different concentrations of HL (a) and <b>2</b> (b) in the presence of 100 $\mu\text{M}$ $\text{H}_2\text{O}_2$ (insets: photographs showing color change upon introducing gradient concentrations of HL (a) and <b>2</b> (b)). ..... | 6  |
| <b>Figure S5.</b> The UV-Vis spectrum of HL (a), <b>1</b> (b), and <b>2</b> (c) in MeOH solutions upon keeping for 24 and 72 h, demonstrating the stability of these species in solutions. ....                                                                                                                                                                        | 7  |
| <b>Table S1.</b> Selected bond lengths ( $\text{\AA}$ ) and bond angles ( $^\circ$ ) for HL, <b>1</b> and <b>2</b> .....                                                                                                                                                                                                                                               | 8  |
| <b>Table S2.</b> The half-maximal inhibitory concentrations ( $\text{IC}_{50}$ ) of HL, <b>1</b> , and <b>2</b> against different cell lines.....                                                                                                                                                                                                                      | 13 |
| <b>Table S3.</b> The pharmacokinetic data for HL via i.v. administration with dosages of 0.5 $\text{mg kg}^{-1}$ in ICR mice ( $n = 3$ ). ....                                                                                                                                                                                                                         | 14 |
| <b>Table S4.</b> The pharmacokinetic data for HL via PO administration with dosages of 30 $\text{mg kg}^{-1}$ in ICR mice ( $n = 3$ ). ....                                                                                                                                                                                                                            | 15 |

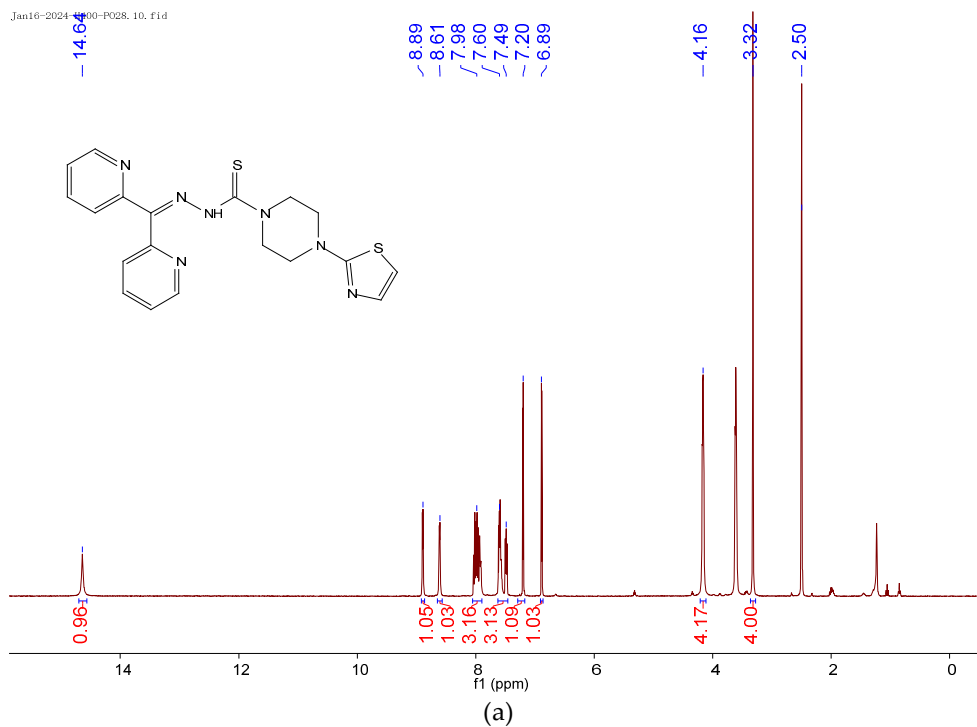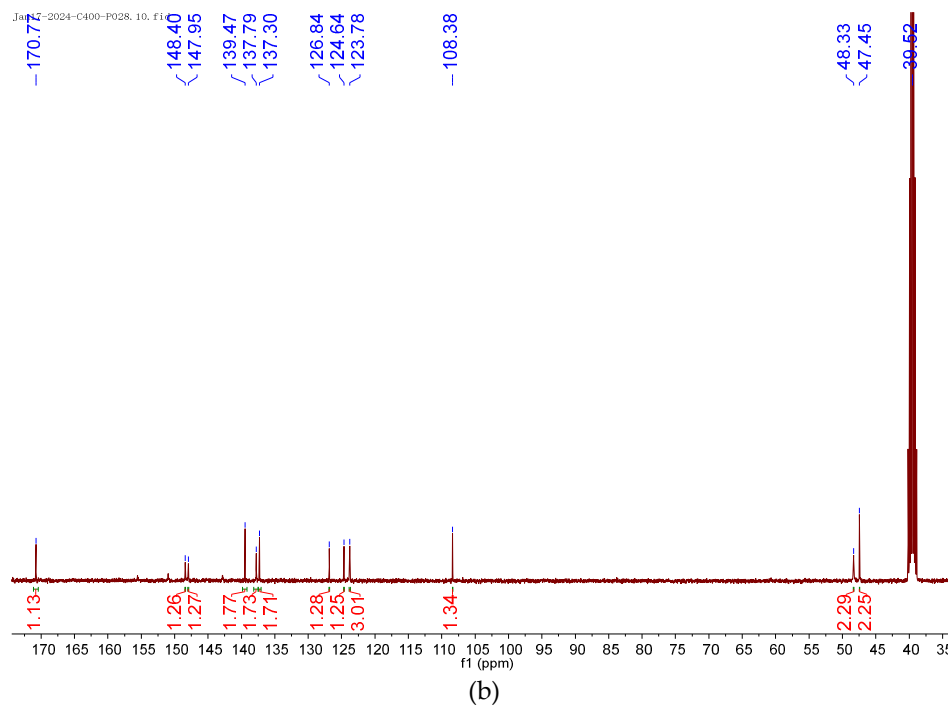

**Figure S1.** <sup>1</sup>H (a) and <sup>13</sup>C (b) NMR spectrum of HL in DMSO-*d*<sub>6</sub>.

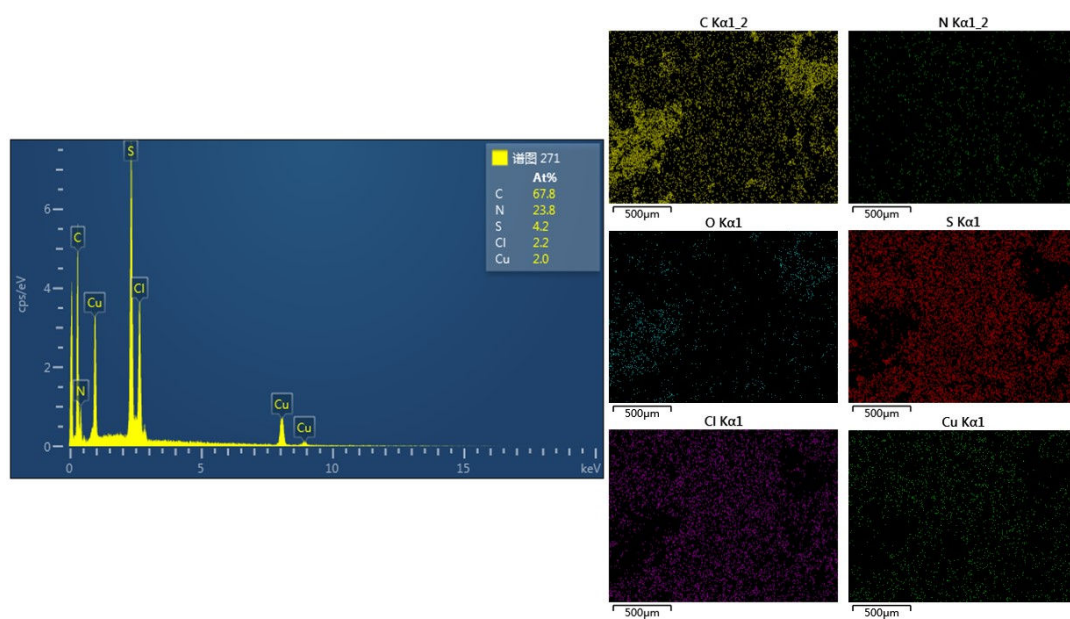

(a)

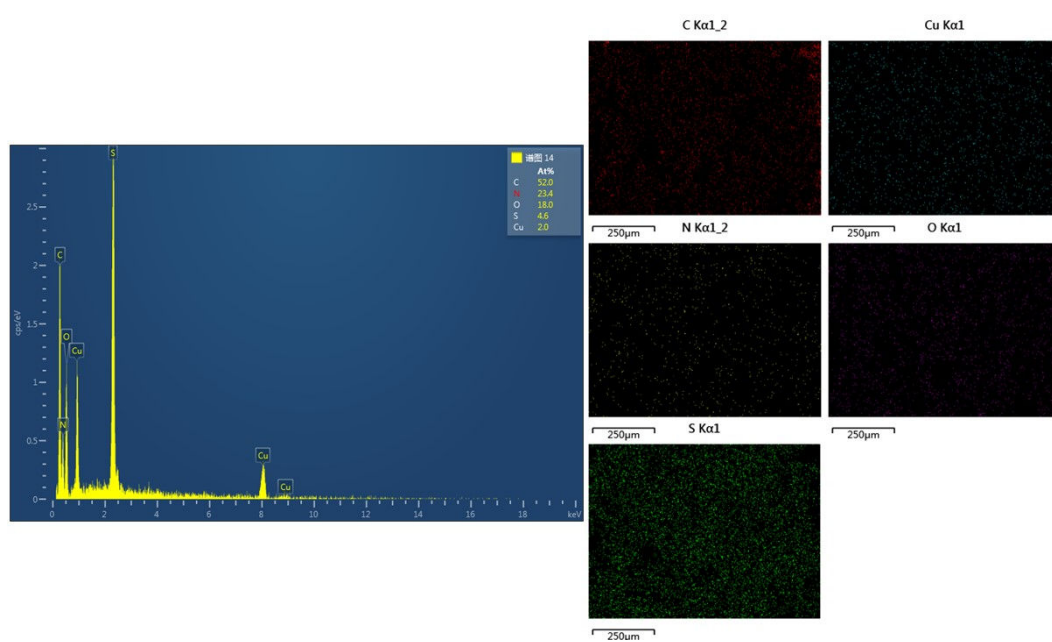

(b)

**Figure S2.** The EDS elemental ratios of **1** (a) and **2** (b) and their respective elemental mapping diagrams.

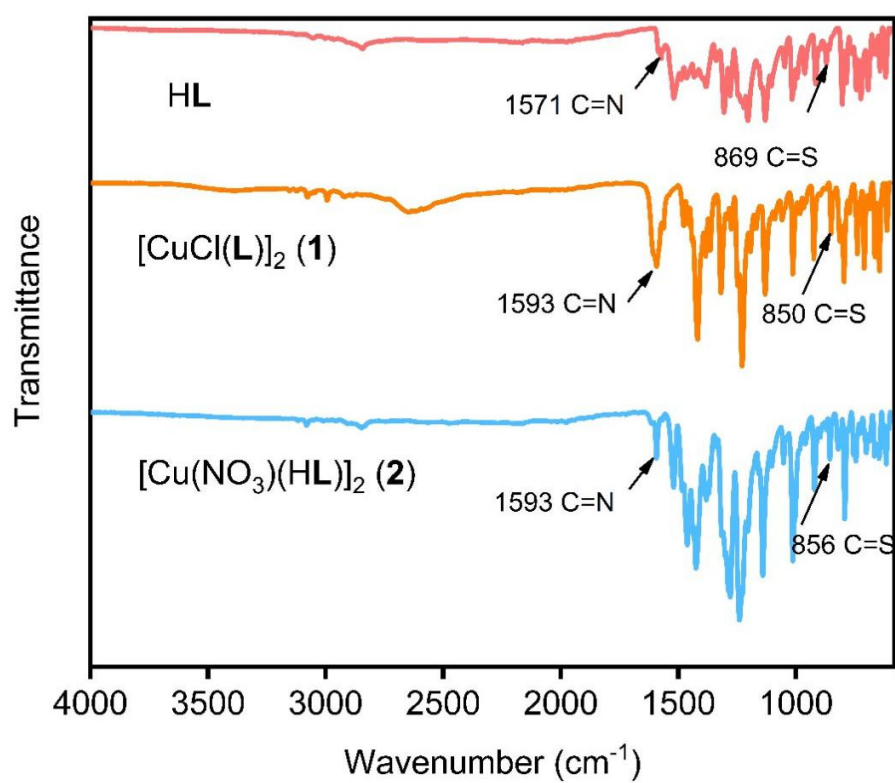

**Figure S3.** The FT-IR of HL (light red), 1 (light orange), and 2 (light blue).

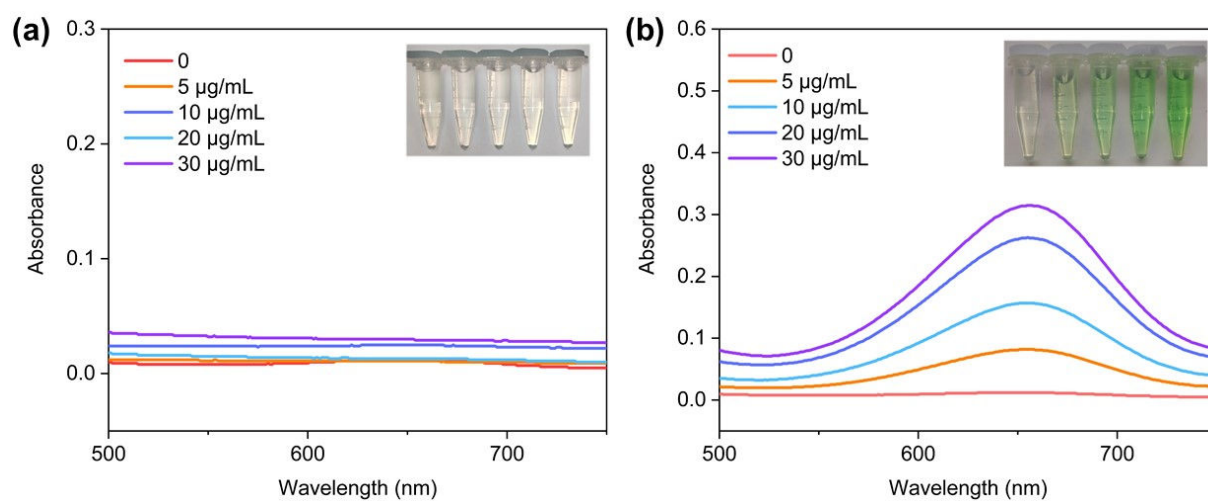

**Figure S4.** Change of UV-Vis absorption intensity in the range of 500–750 nm (peaked at 652 nm; oxTMB) upon treatment with different concentrations of HL (a) and **2** (b) in the presence of 100  $\mu\text{M}$   $\text{H}_2\text{O}_2$  (insets: photographs showing color change upon introducing gradient concentrations of HL (a) and **2** (b)).

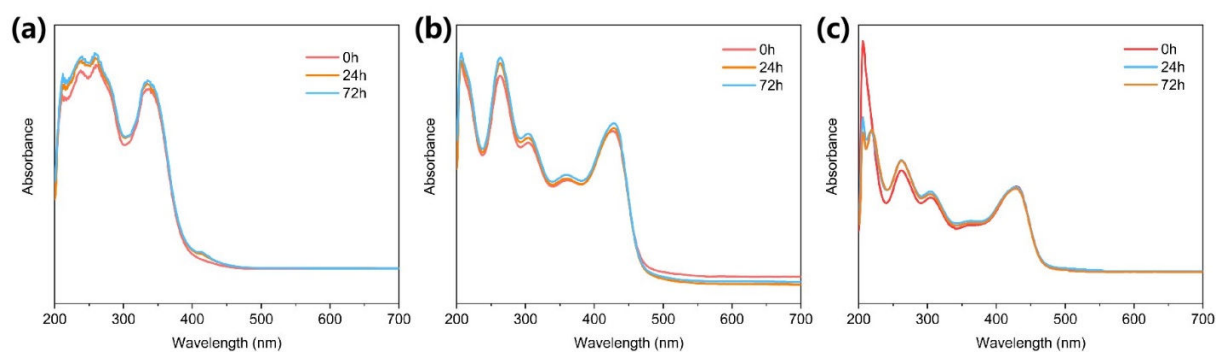

**Figure S5.** The UV-Vis spectrum of HL (a), **1** (b), and **2** (c) in MeOH solutions upon keeping for 24 and 72 h, demonstrating the stability of these species in solutions.

**Table S1.** Selected bond lengths (Å) and bond angles (°) for HL, **1** and **2**.

| Compound HL      |          |                  |          |
|------------------|----------|------------------|----------|
| S(1)-C(1)        | 1.706(6) | S(1)-C(3)        | 1.731(5) |
| S(2)-C(8)        | 1.681(5) | N(1)-C(3)        | 1.314(6) |
| N(1)-C(2)        | 1.385(7) | N(2)-C(3)        | 1.363(6) |
| N(2)-C(7)        | 1.401(7) | N(2)-C(4)        | 1.430(6) |
| N(3)-C(8)        | 1.356(6) | N(3)-C(6)        | 1.453(6) |
| N(3)-C(5)        | 1.467(6) | N(4)-N(5)        | 1.354(5) |
| N(4)-C(8)        | 1.363(6) | C(4)-C(5)        | 1.462(7) |
| N(5)-C(9)        | 1.308(6) | N(6)-C(10)       | 1.325(6) |
| N(6)-C(14)       | 1.352(7) | N(7)-C(19)       | 1.334(6) |
| N(7)-C(15)       | 1.350(6) | C(1)-C(2)        | 1.317(8) |
| C(9)-C(15)       | 1.473(6) | C(6)-C(7)        | 1.414(8) |
| C(10)-C(11)      | 1.364(7) | C(11)-C(12)      | 1.372(7) |
| C(9)-C(10)       | 1.501(6) | C(12)-C(13)      | 1.348(8) |
| C(17)-C(18)      | 1.383(8) | C(13)-C(14)      | 1.352(8) |
| C(15)-C(16)      | 1.386(7) | C(16)-C(17)      | 1.390(7) |
| C(18)-C(19)      | 1.371(7) |                  |          |
|                  |          |                  |          |
| C(1)-S(1)-C(3)   | 89.2(3)  | C(3)-N(1)-C(2)   | 108.6(5) |
| C(3)-N(2)-C(7)   | 121.7(4) | C(3)-N(2)-C(4)   | 119.3(4) |
| C(7)-N(2)-C(4)   | 113.2(4) | C(8)-N(3)-C(6)   | 123.7(4) |
| C(8)-N(3)-C(5)   | 119.5(4) | C(6)-N(3)-C(5)   | 114.7(4) |
| N(5)-N(4)-C(8)   | 120.5(4) | C(9)-N(5)-N(4)   | 118.4(4) |
| C(10)-N(6)-C(14) | 115.9(5) | C(19)-N(7)-C(15) | 118.8(4) |
| C(2)-C(1)-S(1)   | 110.2(4) | C(1)-C(2)-N(1)   | 117.5(5) |
| N(1)-C(3)-N(2)   | 124.1(5) | N(1)-C(3)-S(1)   | 114.5(4) |
| N(2)-C(3)-S(1)   | 121.4(4) | N(2)-C(4)-C(5)   | 112.8(5) |
| C(4)-C(5)-N(3)   | 113.7(5) | C(7)-C(6)-N(3)   | 115.6(5) |
| N(3)-C(8)-N(4)   | 113.7(4) | N(2)-C(7)-C(6)   | 119.4(6) |
| N(3)-C(8)-S(2)   | 124.0(4) | N(4)-C(8)-S(2)   | 122.3(4) |
| N(5)-C(9)-C(15)  | 128.5(4) | N(5)-C(9)-C(10)  | 110.6(4) |
| C(15)-C(9)-C(10) | 121.0(4) | N(6)-C(10)-C(11) | 122.0(5) |
| N(6)-C(10)-C(9)  | 116.4(4) | C(11)-C(10)-C(9) | 121.5(5) |

Table S1 Continued

|                   |          |                   |          |
|-------------------|----------|-------------------|----------|
| C(10)-C(11)-C(12) | 120.4(5) | C(13)-C(12)-C(11) | 118.6(6) |
| C(12)-C(13)-C(14) | 118.0(5) | C(13)-C(14)-N(6)  | 125.0(6) |
| N(7)-C(15)-C(16)  | 120.7(4) | N(7)-C(15)-C(9)   | 117.0(4) |
| C(16)-C(15)-C(9)  | 122.2(4) | C(15)-C(16)-C(17) | 119.7(5) |
| C(18)-C(17)-C(16) | 119.0(5) | C(19)-C(18)-C(17) | 118.1(5) |
| N(7)-C(19)-C(18)  | 123.7(5) |                   |          |

## Compound 1

|                 |            |                  |            |
|-----------------|------------|------------------|------------|
| Cu(1)-N(3)      | 1.989(3)   | Cu(1)-N(2)       | 2.016(3)   |
| Cu(1)-Cl        | 2.2435(10) | Cu(1)-S(2)       | 2.2518(10) |
| N(1)-C(1)       | 1.344(5)   | N(1)-C(5)        | 1.353(4)   |
| N(2)-C(11)      | 1.336(4)   | N(2)-C(7)        | 1.350(4)   |
| N(3)-C(6)       | 1.306(4)   | N(3)-N(4)        | 1.354(4)   |
| N(4)-C(12)      | 1.343(4)   | N(5)-C(12)       | 1.352(5)   |
| N(5)-C(15)      | 1.472(4)   | N(5)-C(13)       | 1.474(4)   |
| N(6)-C(17)      | 1.378(5)   | N(6)-C(14)       | 1.444(5)   |
| N(6)-C(16)      | 1.476(4)   | N(7)-C(18)       | 1.361(5)   |
| N(7)-C(17)      | 1.373(5)   | C(1)-C(2)        | 1.387(5)   |
| C(6)-C(7)       | 1.477(5)   | C(2)-C(3)        | 1.393(5)   |
| C(8)-C(9)       | 1.390(5)   | C(3)-C(4)        | 1.377(5)   |
| C(9)-C(10)      | 1.376(5)   | C(4)-C(5)        | 1.396(5)   |
| C(10)-C(11)     | 1.388(5)   | C(5)-C(6)        | 1.482(5)   |
| C(12)-S(2)      | 1.739(4)   | C(7)-C(8)        | 1.395(5)   |
| C(13)-C(14)     | 1.536(5)   | C(15)-C(16)      | 1.529(5)   |
| C(17)-S(1)      | 1.730(4)   | C(18)-C(19)      | 1.336(6)   |
| C(19)-S(1)      | 1.713(4)   |                  |            |
|                 |            |                  |            |
| N(3)-Cu(1)-N(2) | 80.60(12)  | N(6)-C(14)-C(13) | 111.4(3)   |
| N(3)-Cu(1)-Cl   | 165.09(9)  | N(2)-Cu(1)-Cl    | 97.99(9)   |
| N(3)-Cu(1)-S(2) | 83.91(9)   | N(2)-Cu(1)-S(2)  | 163.71(9)  |
| Cl-Cu(1)-S(2)   | 95.66(4)   | C(1)-N(1)-C(5)   | 116.7(3)   |
| C(11)-N(2)-C(7) | 119.5(3)   | C(11)-N(2)-Cu(1) | 126.7(2)   |
| C(7)-N(2)-Cu(1) | 113.5(2)   | C(6)-N(3)-N(4)   | 120.4(3)   |
| C(6)-N(3)-Cu(1) | 116.1(2)   | N(4)-N(3)-Cu(1)  | 123.4(2)   |
| C(12)-N(4)-N(3) | 111.9(3)   | C(12)-N(5)-C(15) | 120.6(3)   |

Table S1 Continued

|                  |           |                  |          |
|------------------|-----------|------------------|----------|
| C(12)-N(5)-C(13) | 122.1(3)  | C(15)-N(5)-C(13) | 111.3(3) |
| C(17)-N(6)-C(14) | 116.9(3)  | C(17)-N(6)-C(16) | 119.9(3) |
| C(14)-N(6)-C(16) | 112.0(3)  | C(18)-N(7)-C(17) | 108.0(3) |
| N(1)-C(1)-C(2)   | 124.3(3)  | C(3)-C(4)-C(5)   | 119.3(3) |
| C(4)-C(3)-C(2)   | 119.0(3)  | C(1)-C(2)-C(3)   | 117.9(3) |
| N(1)-C(5)-C(4)   | 122.6(3)  | N(1)-C(5)-C(6)   | 116.4(3) |
| C(4)-C(5)-C(6)   | 121.0(3)  | N(3)-C(6)-C(7)   | 114.8(3) |
| N(3)-C(6)-C(5)   | 123.9(3)  | C(7)-C(6)-C(5)   | 121.1(3) |
| N(2)-C(7)-C(8)   | 121.0(3)  | N(2)-C(7)-C(6)   | 114.7(3) |
| C(8)-C(7)-C(6)   | 124.3(3)  | C(9)-C(8)-C(7)   | 118.7(3) |
| C(10)-C(9)-C(8)  | 120.1(3)  | C(9)-C(10)-C(11) | 118.0(3) |
| N(2)-C(11)-C(10) | 122.6(3)  | N(4)-C(12)-N(5)  | 116.7(3) |
| N(4)-C(12)-S(2)  | 124.6(3)  | N(5)-C(12)-S(2)  | 118.7(3) |
| N(5)-C(13)-C(14) | 107.9(3)  | N(5)-C(15)-C(16) | 109.1(3) |
| N(6)-C(16)-C(15) | 111.1(3)  | C(18)-C(19)-S(1) | 110.2(3) |
| N(7)-C(17)-N(6)  | 124.8(3)  | N(7)-C(17)-S(1)  | 113.9(3) |
| N(6)-C(17)-S(1)  | 121.1(3)  | C(19)-C(18)-N(7) | 118.4(4) |
| C(12)-S(2)-Cu(1) | 95.73(12) | C(19)-S(1)-C(17) | 89.5(2)  |

## Compound 2

|              |           |            |            |
|--------------|-----------|------------|------------|
| Cu(1)-N(5)   | 1.961(4)  | Cu(1)-N(6) | 2.017(4)   |
| Cu(1)-O(1)   | 2.024(4)  | Cu(1)-S(2) | 2.2733(16) |
| Cu(1)-N(7)#1 | 2.357(5)  | S(1)-C(1)  | 1.724(7)   |
| S(1)-C(3)    | 1.748(6)  | S(2)-C(8)  | 1.744(6)   |
| O(1)-N(8)    | 1.281(6)  | O(2)-N(8)  | 1.226(6)   |
| O(3)-N(8)    | 1.235(7)  | N(1)-C(3)  | 1.300(8)   |
| N(1)-C(2)    | 1.379(8)  | N(2)-C(3)  | 1.368(7)   |
| N(2)-C(7)    | 1.428(8)  | N(2)-C(4)  | 1.444(8)   |
| N(3)-C(8)    | 1.353(7)  | N(3)-C(6)  | 1.451(8)   |
| N(3)-C(5)    | 1.469(8)  | N(4)-C(8)  | 1.323(7)   |
| N(4)-N(5)    | 1.351(6)  | N(5)-C(9)  | 1.301(7)   |
| N(6)-C(14)   | 1.333(7)  | N(6)-C(10) | 1.347(7)   |
| N(7)-C(15)   | 1.335(7)  | N(7)-C(19) | 1.341(7)   |
| C(1)-C(2)    | 1.332(10) | C(4)-C(5)  | 1.402(10)  |
| C(6)-C(7)    | 1.393(11) | C(9)-C(10) | 1.468(7)   |

Table S1 Continued

|                    |            |                    |            |
|--------------------|------------|--------------------|------------|
| C(9)-C(15)         | 1.491(7)   | C(10)-C(11)        | 1.396(8)   |
| C(11)-C(12)        | 1.389(8)   | C(12)-C(13)        | 1.368(9)   |
| C(13)-C(14)        | 1.382(9)   | C(15)-C(16)        | 1.380(8)   |
| C(16)-C(17)        | 1.376(8)   | C(17)-C(18)        | 1.377(9)   |
| C(18)-C(19)        | 1.373(9)   |                    |            |
|                    |            |                    |            |
| N(5)-Cu(1)-N(6)    | 80.90(18)  | N(7)-C(19)-C(18)   | 123.5(6)   |
| N(5)-Cu(1)-O(1)    | 156.10(17) | N(6)-Cu(1)-O(1)    | 93.88(17)  |
| N(5)-Cu(1)-S(2)    | 84.14(13)  | N(6)-Cu(1)-S(2)    | 164.95(14) |
| O(1)-Cu(1)-S(2)    | 99.18(12)  | N(5)-Cu(1)-N(7)#1  | 116.76(17) |
| N(6)-Cu(1)-N(7)#1  | 89.60(18)  | O(1)-Cu(1)-N(7)#1  | 86.32(16)  |
| S(2)-Cu(1)-N(7)#1  | 98.63(12)  | C(1)-S(1)-C(3)     | 88.2(3)    |
| C(8)-S(2)-Cu(1)    | 94.53(19)  | N(8)-O(1)-Cu(1)    | 109.3(3)   |
| C(3)-N(1)-C(2)     | 109.1(5)   | C(3)-N(2)-C(7)     | 121.5(5)   |
| C(3)-N(2)-C(4)     | 118.7(5)   | C(7)-N(2)-C(4)     | 115.6(5)   |
| C(8)-N(3)-C(6)     | 123.4(5)   | C(8)-N(3)-C(5)     | 121.2(5)   |
| C(6)-N(3)-C(5)     | 114.4(5)   | C(8)-N(4)-N(5)     | 112.4(4)   |
| C(9)-N(5)-N(4)     | 119.6(4)   | C(9)-N(5)-Cu(1)    | 116.6(4)   |
| N(4)-N(5)-Cu(1)    | 123.7(3)   | C(14)-N(6)-C(10)   | 119.6(5)   |
| C(14)-N(6)-Cu(1)   | 127.5(4)   | C(10)-N(6)-Cu(1)   | 112.8(4)   |
| C(15)-N(7)-C(19)   | 117.3(5)   | C(15)-N(7)-Cu(1)#1 | 123.3(4)   |
| C(19)-N(7)-Cu(1)#1 | 114.7(4)   | O(2)-N(8)-O(3)     | 122.5(5)   |
| O(2)-N(8)-O(1)     | 118.9(5)   | O(3)-N(8)-O(1)     | 118.6(5)   |
| C(2)-C(1)-S(1)     | 110.1(5)   | C(1)-C(2)-N(1)     | 117.3(6)   |
| N(1)-C(3)-N(2)     | 124.7(5)   | N(1)-C(3)-S(1)     | 115.3(4)   |
| N(2)-C(3)-S(1)     | 120.0(4)   | C(5)-C(4)-N(2)     | 115.6(6)   |
| C(4)-C(5)-N(3)     | 114.7(6)   | C(7)-C(6)-N(3)     | 115.1(7)   |
| C(6)-C(7)-N(2)     | 117.2(7)   | N(4)-C(8)-N(3)     | 115.7(5)   |
| N(4)-C(8)-S(2)     | 125.2(4)   | N(3)-C(8)-S(2)     | 119.2(4)   |
| N(5)-C(9)-C(10)    | 114.7(5)   | N(5)-C(9)-C(15)    | 123.1(5)   |
| C(10)-C(9)-C(15)   | 122.2(5)   | N(6)-C(10)-C(11)   | 121.1(5)   |
| N(6)-C(10)-C(9)    | 114.9(5)   | C(11)-C(10)-C(9)   | 124.0(5)   |
| C(12)-C(11)-C(10)  | 118.5(6)   | C(13)-C(12)-C(11)  | 119.6(6)   |
| C(12)-C(13)-C(14)  | 119.1(6)   | N(6)-C(14)-C(13)   | 122.0(6)   |
| N(7)-C(15)-C(16)   | 122.9(5)   | N(7)-C(15)-C(9)    | 116.3(5)   |

Table S1 Continued

|                   |          |                   |          |
|-------------------|----------|-------------------|----------|
| C(16)-C(15)-C(9)  | 120.9(5) | C(17)-C(16)-C(15) | 118.7(6) |
| C(16)-C(17)-C(18) | 119.3(6) | C(19)-C(18)-C(17) | 118.2(6) |

Symmetry transformations used to generate equivalent atoms: #1  $-x - 2, -y + 2, -z + 1$

---

**Table S2.** The half-maximal inhibitory concentrations (IC<sub>50</sub>) of HL, **1**, and **2** against different cell lines.

|           | IC <sub>50</sub> (nmol/mL) |          |                       |
|-----------|----------------------------|----------|-----------------------|
|           | HL                         | <b>1</b> | <b>2</b>              |
| Hep-G2    | 78.83                      | 38.11    | 16.86                 |
| PLC/PRF/5 | 3.26                       | 2.18     | 2.54×10 <sup>-5</sup> |
| HuH-7     | 192.20                     | 176.60   | 87.53                 |

**Table S3.** The pharmacokinetic data for HL via i.v. administration with dosages of 0.5 mg kg<sup>-1</sup> in ICR mice (n = 3).

| Individual and mean plasma concentration-time data |               |                         |                          |         |         |                 |        |        |
|----------------------------------------------------|---------------|-------------------------|--------------------------|---------|---------|-----------------|--------|--------|
| Dose<br>(mg·kg <sup>-1</sup> )                     | Dose<br>route | Sampling<br>time<br>(h) | Concentration<br>(ng/mL) |         |         | Mean<br>(ng/mL) | SD     | CV (%) |
|                                                    |               |                         | 4                        | 5       | 6       |                 |        |        |
| 0.50                                               | IV            | 0.03                    | 853.50                   | 805.60  | 760.20  | 806.43          | 46.66  | 5.79   |
|                                                    |               | 0.50                    | 407.40                   | 426.80  | 213.60  | 349.27          | 117.89 | 33.75  |
|                                                    |               | 1.00                    | 419.70                   | 361.50  | 242.30  | 341.17          | 90.43  | 26.51  |
|                                                    |               | 2.00                    | 447.60                   | 405.10  | 263.20  | 371.97          | 96.56  | 25.96  |
|                                                    |               | 4.00                    | 346.80                   | 274.20  | 98.40   | 239.80          | 127.72 | 53.26  |
|                                                    |               | 8.00                    | 218.90                   | 227.60  | 41.40   | 162.63          | 105.08 | 64.61  |
|                                                    |               | 24.00                   | 113.30                   | 88.60   | 49.40   | 83.77           | 32.22  | 38.47  |
| PK Parameters                                      |               | Unit                    | 4                        | 5       | 6       | Mean            | SD     | /      |
| R <sup>2</sup>                                     |               | NA                      | 0.89                     | 1.00    | 0.44    | 0.78            | 0.30   | 38.00  |
| T <sub>1/2</sub>                                   |               | h                       | 13.40                    | 12.12   | 10.12   | 11.88           | 1.66   | 13.93  |
| T <sub>max</sub>                                   |               | h                       | 0.03                     | 0.03    | 0.03    | 0.03            | 0.00   | 0.00   |
| C <sub>0</sub>                                     |               | ng/mL                   | 899.29                   | 842.59  | 831.55  | 857.81          | 36.35  | 4.24   |
| AUC <sub>last</sub>                                |               | h*ng/mL                 | 5547.17                  | 5107.84 | 1987.97 | 4214.32         | 1940.5 | 46.05  |
| AUC <sub>0-inf</sub>                               |               | h*ng/mL                 | 7738.05                  | 6656.93 | 2709.11 | 5701.36         | 2647.1 | 46.43  |
| V <sub>z_obs</sub>                                 |               | mL/kg                   | 1249.48                  | 1313.23 | 2694.23 | 1752.31         | 816.35 | 46.59  |
| Cl <sub>obs</sub>                                  |               | mL/h/kg                 | 64.62                    | 75.11   | 184.56  | 108.10          | 66.43  | 61.45  |
| MRT <sub>last</sub>                                |               | h                       | 8.15                     | 7.85    | 7.55    | 7.85            | 0.30   | 3.81   |
| V <sub>ss_obs</sub>                                |               | mL/kg                   | 1170.20                  | 1177.58 | 2918.63 | 1755.47         | 1007.3 | 57.38  |

**Table S4.** The pharmacokinetic data for HL via PO administration with dosages of 30 mg kg<sup>-1</sup> in ICR mice (n = 3).

| Individual and mean plasma concentration-time data |               |                         |                          |           |          |                      |        |        |
|----------------------------------------------------|---------------|-------------------------|--------------------------|-----------|----------|----------------------|--------|--------|
| Dose<br>(mg·kg <sup>-1</sup> )                     | Dose<br>route | Sampling<br>time<br>(h) | Concentration<br>(ng/mL) |           |          | Mean<br>(ng/mL)<br>/ | SD     | CV (%) |
|                                                    |               |                         | 1                        | 2         | 3        |                      |        |        |
| 30                                                 | PO            | 0.50                    | 280.8                    | 350.5     | 95.9     | 242.40               | 131.6  | 54.3   |
|                                                    |               | 1.00                    | 400.3                    | 264.1     | 613.4    | 425.93               | 176.1  | 41.3   |
|                                                    |               | 2.00                    | 452.9                    | 314.0     | 462.6    | 409.83               | 83.1   | 20.3   |
|                                                    |               | 4.00                    | 408.7                    | 221.3     | 317.2    | 315.73               | 93.7   | 29.7   |
|                                                    |               | 8.00                    | 253.0                    | 163.0     | 236.7    | 217.57               | 48.0   | 22.0   |
|                                                    |               | 24.00                   | 226.5                    | 114.6     | 93.3     | 144.80               | 71.6   | 49.4   |
| PK Parameters                                      |               | Unit                    | 1                        | 2         | 3        | Mean                 | SD     | /      |
| R <sup>2</sup>                                     |               | NA                      | 0.21                     | 0.83      | 1.00     | 0.68                 | 0.4    | 61.1   |
| T <sub>1/2</sub>                                   |               | h                       | 30.06                    | 23.26     | 11.49    | 21.61                | 9.4    | 43.5   |
| T <sub>max</sub>                                   |               | h                       | 2.00                     | 0.50      | 1.00     | 1.17                 | 0.8    | 65.5   |
| C <sub>max</sub>                                   |               | ng/mL                   | 452.90                   | 350.50    | 613.40   | 472.27               | 132.5  | 28.1   |
| AUC <sub>last</sub>                                |               | h*ng/mL                 | 6688.08                  | 4055.03   | 5266.90  | 5336.67              | 1317.9 | 24.7   |
| AUC <sub>0-inf</sub>                               |               | h*ng/mL                 | 16512.12                 | 7901.48   | 6813.43  | 10409.01             | 5313.4 | 51.0   |
| V <sub>z_F_obs</sub>                               |               | mL/kg                   | 78802.61                 | 127435.04 | 72984.82 | 93074.16             | 29899. | 32.1   |
| Cl <sub>F_obs</sub>                                |               | mL/h/kg                 | 1816.85                  | 3796.76   | 4403.07  | 3338.89              | 1352.5 | 40.5   |
| MRT <sub>last</sub>                                |               | h                       | 10.52                    | 9.60      | 8.07     | 9.40                 | 1.2    | 13.1   |
